# Supplementary material for: Novel field-based approaches reveal wheat genotypic differences in nitrogen use efficiency and grain protein dynamics
Source: Research Square preprint supplement (doi:10.21203/rs.3.rs-8261533/v1), 2025-12-09
Supplement: Supplementary file 1 [file 44feffc57b126a1c4943d19a.docx]

**Supplementary figures:**

**Figure S1:** **Total rainfall and temperature in Cambridge over the duration of the two-year trial** *(Blue lines, left axis: daily rainfall; Orange lines, right axis: maximum (full) and minimum (broken) daily temperatures)***.**

**Table S1** **N fertiliser application rate per split**

| **Target Rate (kg N ha-1)** | **Actual rate (kg N ha-1)** | **Date of application for each of the three splits** | | |
| --- | --- | --- | --- | --- |
| **10/03/2017** | **29/03/2017** | **10/04/2017** |
| 0 | 0 | 0 | 0 | 0 |
| 70 | 69 | 0 | 34 | 35 |
| 140 | 141 | 40.2 | 50.3 | 50 |
| 210 | 213 | 40.2 | 87.4 | 85 |
| 280 | 280 | 48.8 | 121 | 110 |
| 350 | 353 | 48.8 | 159 | 145 |

| **Target Rate (kg N ha-1)** | **Actual rate (kg N ha-1)** | **Date of application for each of the three splits** | | |
| --- | --- | --- | --- | --- |
| **20/03/2018** | **26/04/2018** | **09/05/2018** |
| 0 | 0 | 0 | 0 | 0 |
| 70 | 69 | 0 | 34.5 | 34.6 |
| 140 | 140 | 39.8 | 50.3 | 50.3 |
| 210 | 210 | 39.8 | 85.3 | 85.3 |
| 280 | 284 | 60.7 | 111.5 | 111.5 |
| 350 | 350 | 60.7 | 144.5 | 144.5 |

**Table S2 Statistical analysis for yield response (Data shown in Fig. 1)**

|  | **P value** |
| --- | --- |
| Year | *p* < 0.001 |
| Variety | *p* < 0.001 |
| N Treatment | *p* < 0.001 |
| Year x Variety | *p* < 0.1 |
| Year x N Treatment | n.s. |
| Variety x N Treatment | n.s. |
| Year x Variety x N Treatment | n.s. |

**Figure S2:** **Yield and GPC were lower in 2018 compared to 2017.** Wheat yield (t ha-1) and grain protein data shown as the mean ± se separately for 2017 and 2018, individual plot datapoint are also shown.

**Figure S3: Varietal performance under varied N rates.** BLUEs for each N level are shown for each variety. * indicates statistical significance

**Figure S4 N Uptake Efficiency and Nitrogen Harvest Index (NHI).** NHI calculated as Grain N content relative to above-ground plant N content.

A

B

**Figure S5:** **Steady increased in yield in more recently released varieties especially under higher N application rate.** Data shown as BLUEs for yield and year of registration dates, as shown in Table 1.

**Figure S6: Varietal differences in the correlation between yield and NDVI at GS31.** Correlation between yield and NDVI measurements at GS31 for each individual variety.

**Figure S7: Higher correlation between NDVI and yield under lower N availability.** Correlation between yield and NDVI measurements at GS31 at each N rate.

**Figure S8: SPAD and LCC data correlate well over a range of N rate**

**Figure S9: Varietal differences in spike weight** Data shown asBLUEs from combined data for 2017 and 2018.

**Figure S10: Significant differences in GPC amongst varieties** Data shown asBLUEs from combined data for 2017 and 2018.

**Figure S11: Correlation between GPC and Yield at different N rates.** Data shown as individual datapoints and correlations are shown for each N levels.

**Figure S12: Phenology of each variety and under different N level in 2017.** Data shown as individual plots, colour indicates N level with darker green indicating higher N level. Cordiale is shown as reaching GS31, GS55 and GS61 earlier than other varieties. Overall there was no measurable effect of N rate on phenology.
